# Calcium imaging and the curse of negativity

1 Gilles Vanwalleghem<sup>1\*</sup>, Lena Constantin<sup>1</sup>, Ethan K. Scott<sup>1</sup>

2 <sup>1</sup>Neural Circuits and Behavior laboratory, Queensland Brain Institute, The University of Queensland,  
3 St Lucia, Queensland, Australia

4 \* Correspondence:

5 Corresponding Authors

6 [g.vanwalleghem@uq.edu.au](mailto:g.vanwalleghem@uq.edu.au)

7

8 **Keywords:** Calcium imaging<sup>1</sup>, Zebrafish<sup>2</sup>, Inhibition<sup>3</sup>, GCaMP<sup>4</sup>, Data Analysis<sup>5</sup>, Cerebellum<sup>6</sup>,  
9 Segmentation<sup>7</sup>, Clusterings<sup>8</sup>

## 10 Abstract

11 The imaging of neuronal activity using calcium indicators has become a staple of modern  
12 neuroscience. However, without ground truths, there is a real risk of missing a significant portion of  
13 the real responses. Here, we show that a common assumption, the non-negativity of the neuronal  
14 responses as detected by calcium indicators, biases all levels of the frequently used analytical  
15 methods for these data. From the extraction of meaningful fluorescence changes to spike inference  
16 and the analysis of inferred spikes, each step risks missing real responses because of the assumption  
17 of non-negativity. We first show that negative deviations from baseline can exist in calcium imaging  
18 of neuronal activity. Then, we use simulated data to test three popular algorithms for image analysis,  
19 finding that suite2p may be the best suited to large datasets. Spike inference algorithms also showed  
20 their limitations in dealing with inhibited neurons, and new approaches may be needed to address this  
21 problem. We further suggest avoiding data analysis approaches that may ignore inhibited responses  
22 in favor of a first exploratory step to ensure that none are present. Taking these steps will ensure that  
23 inhibition, as well as excitation, is detected in calcium imaging datasets.

## 24 1 Introduction

25 The advent of Genetically Encoded Calcium Indicators (GECI) has revolutionized neurosciences by  
26 allowing the imaging of neuronal activity (Nakai, Ohkura et al. 2001, Pologruto, Yasuda et al. 2004,  
27 Tian, Hires et al. 2009), and they are now being integrated in other fields (Balaji, Bielmeier et al.  
28 2017, Shannon, Stevens et al. 2017, Stevenson, Vanwalleghem et al. 2020). A simultaneous boom in  
29 microscopy techniques has allowed scientists to image the activity of neurons from animals such as  
30 larval zebrafish (Wyart, Del Bene et al. 2009, Ahrens, Li et al. 2012, Constantin, Poulsen et al. 2020,  
31 Vanwalleghem, Schuster et al. 2020); flies (Wang, Wong et al. 2003, Suh, Wong et al. 2004), and  
32 rodents (Chen, Cichon et al. 2012, Cai, Aharoni et al. 2016, Klioutchnikov, Wallace et al. 2020) *in-*  
33 *vivo* in real time thanks to GECIs. Computational tools are constantly being developed to process and  
34 extract the neuronal activity from the vast datasets that these imaging methods generate (Mukamel,  
35 Nimmerjahn et al. 2009, Freeman, Vladimirov et al. 2014, Pachitariu, Stringer et al. 2017,  
36 Giovannucci, Friedrich et al. 2019, Stringer and Pachitariu 2019). A common assumption in most of  
37 the modern computational tools is the non-negativity of the GECI's signal.

38 However, negative deviations from the fluorescence baselines have been observed, and these  
39 assumptions of non-negativity may bias the results and observation by excluding relevant responses  
40 that do not show the expected peaks of activity above baseline (Favre-Bulle, Vanwalleghem et al.  
41 2018, Marquez-Legorreta, Constantin et al. 2019, Zimmerman, Huey et al. 2019). With the slow rise  
42 and decay of GECI probes, in the hundreds of milliseconds, a long-term average firing rate above  
43 0.1Hz would be convolved as a constant fluorescence increase above baseline. Such constant activity  
44 can be found in vestibular neurons, even at rest (Shimazu and Precht 1965, Cullen and McCrea  
45 1993), and in the primary visual cortex neurons (Baddeley, Abbott et al. 1997) among a great many  
46 others.

47 Inhibition of tonically active neurons has been observed with electrophysiology in vestibular  
48 neurons(Shimazu and Precht 1966), Purkinje cells (Tian, Tep et al. 2013), or distributed across the  
49 brain in response to stimulus-driven decisions (Steinmetz, Zátka-Haas et al. 2019). Inhibition of tonic  
50 neurons, convolved by the slow GECI kernels, would translate to negative deviations from baseline  
51 as we and others have observed (Favre-Bulle, Vanwalleghem et al. 2018, Zimmerman, Huey et al.  
52 2019).

53 Many tools for GECI analysis include methods for inferring the spike train that generated the  
54 observed fluorescence signal, and again most of these spike deconvolution algorithms assume non-  
55 negativity (Vogelstein, Packer et al. 2010, Pachitariu, Stringer et al. 2018). The spikefinder online  
56 challenge had this implicit assumption in the datasets offered to the community (Theis, Berens et al.  
57 2016), meaning that the best performing algorithms were based on convolutional neural networks.  
58 This supervised approach, however, would miss response profiles that were absent in their training  
59 datasets as a result of the assumption of non-negativity.

60 Finally, we can find this non-negative assumption present during the analysis of the neuronal  
61 responses extracted from the calcium datasets. For example, Non-negative Matrix Factorization  
62 (NMF) has been used as a dimensionality reduction or clustering tool (Freeman, Vladimirov et al.  
63 2014, Mu, Bennett et al. 2019, Torigoe, Islam et al. 2019). Another approach that we and others have  
64 used is the binarization of the data based on a threshold of activity to generate “bar codes” of the  
65 brain activity, which also has an intrinsic non-negative assumption (Kubo, Hablitzel et al. 2014,  
66 Naumann, Fitzgerald et al. 2016, Heap, Vanwalleghem et al. 2018, Daviu, Fuzesi et al. 2020, Etter,  
67 Manseau et al. 2020). Other threshold-based approaches, or even data cleaning steps, could also  
68 discard all the negative deviations from baseline, biasing conclusions drawn from the dataset to  
69 exclude inhibition from the modeled system.

70 We find this non-negative assumption at all levels of calcium imaging analysis, from the  
71 fluorescence extraction, to spike inference and neuronal response analysis. Our goal here has been to  
72 assess how the most popular calcium imaging analysis toolboxes deal with negative deviations from  
73 the baseline, which we assume come from inhibited tonic neurons. We also hope to spark a  
74 discussion on how these assumptions may have biased past studies, and may continue to bias future  
75 studies using GECIs.

## 76 **2 Materials and Methods**

77 The imaging data came from (Favre-Bulle, Vanwalleghem et al. 2018). Briefly, experiments were  
78 carried on 6 day post-fertilization (dpf) *nacre* mutant zebrafish (*Danio rerio*) larvae of the Tuple  
79 Longfin strain carrying the transgene *elavl3:H2B-GCaMP6s* (Chen, Wardill et al. 2013). The larvae  
80 were immobilized in 2% low melting point agarose (Progen Biosciences, Australia) and imaged

81 using a diffuse digitally scanned light-sheet microscope (Taylor, Vanwalleghem et al. 2018) while an  
82 optical trap was applied to the otolith to simulate acceleration (Favre-Bulle, Stilgoe et al. 2017,  
83 Favre-Bulle, Vanwalleghem et al. 2018, Favre-Bulle, Stilgoe et al. 2019, Favre-Bulle, Taylor et al.  
84 2020). All procedures were performed with approval from the University of Queensland Animal  
85 Welfare Unit in accordance with approval SBMS/378/16/ARC.

86 Artificial datasets were generated using the Neural Anatomy and Optical Microscopy simulation  
87 toolbox (Charles, Song et al. 2019). We used the parameters for nuclear simulation with GCaMP6f  
88 default (see table 1). To simulate inhibited neurons responses, we randomly attributed a spike number  
89 from a Poisson distribution ( $\lambda$  of 1, based on (Baddeley, Abbott et al. 1997)) to each 200ms time  
90 window of ten to twenty percent of all simulated neurons (since ~20% of neurons were inhibited  
91 when observed by (Steinmetz, Zatzka-Haas et al. 2019)). We then set a time frame of 0.2 to 5 seconds  
92 of inhibition (0 spikes), which was used to simulate the neuronal activity and generate movies that  
93 were processed with the tools below.

94 For fluorescence extraction and spike inference, we benchmarked the most cited calcium imaging  
95 toolboxes: suite2p (suite2p, version 0.8.0, RRID:SCR\_016434) (Pachitariu, Stringer et al. 2017),  
96 CaImAn version 1.8 (Giovannucci, Friedrich et al. 2019), and the PCA/ICA approach CellSort  
97 (Mukamel, Nimmerjahn et al. 2009). We did not simulate motion, and as such did not use the  
98 registration algorithms included in either suite2p or CaImAn. The parameters used for each of these  
99 approaches can be found the [github repository](#). Briefly, for suite2p we used the sourcery roi  
100 extraction, with a  $\tau$  of 2, frame rate of 5, diameter of neurons (4,6), threshold scaling of 0.5 and a  
101 high pass of 50. For CaImAn, we used the CNMFE, a  $\tau$  of 2, frame rate of 5, a gSig of 4 and  
102 autoregressive order of 2. For the deep-learning spike inference method CASCADE, we used the  
103 Universal\_5Hz\_smoothing200ms pretrained model to infer the spikes on our dataset (Rupprecht,  
104 Carta et al. 2020).

105 For the analysis of the responses, we used MATLAB (R2018b, RRID: SCR\_001622).  $\Delta F/F_0$  was  
106 computed as in (Akerboom, Chen et al. 2012). We used the non-negative matrix factorization  
107 function nnmf with 15 factors to reanalyze the data from (Favre-Bulle, Vanwalleghem et al. 2018).  
108 We used the correlation coefficients tools from MATLAB to compute the 2-dimensional correlation  
109 between the ROIs and the ideal components, as well as between the traces or spikes and the ideal  
110 traces or spikes.

111 Statistical tests and plotting were done in Graphpad Prism (8.4.3, RRID:SCR\_002798), we used  
112 ordinary ANOVA with Tukey's multiple comparison test.

113 All the code used to generate and analyze the data can be found on [github.com/Scott-Lab-](https://github.com/Scott-Lab-QBI/NegativeCalciumResponses)  
114 [QBI/NegativeCalciumResponses](https://github.com/Scott-Lab-QBI/NegativeCalciumResponses).

## 115 **3 Results**

### 116 **3.1 Real data**

117 First, we reanalyzed a zebrafish dataset from our previous study of vestibular processing in which we  
118 identified inhibited responses in hundreds of neurons across the thalamus and cerebellum (Favre-  
119 Bulle, Vanwalleghem et al. 2018). For this analysis, we focus on two neurons from the cerebellum  
120 and hindbrain of a larval zebrafish (Fig.1A) as larvae were subjected to vestibular stimuli (Fig.1B,  
121 shaded areas). As seen in the raw data (Fig.1B, arrows), we observe negative deviations from  
122 baseline during stimulation (Fig.1B, magenta traces), as well as positive responses (Fig.1B, green).

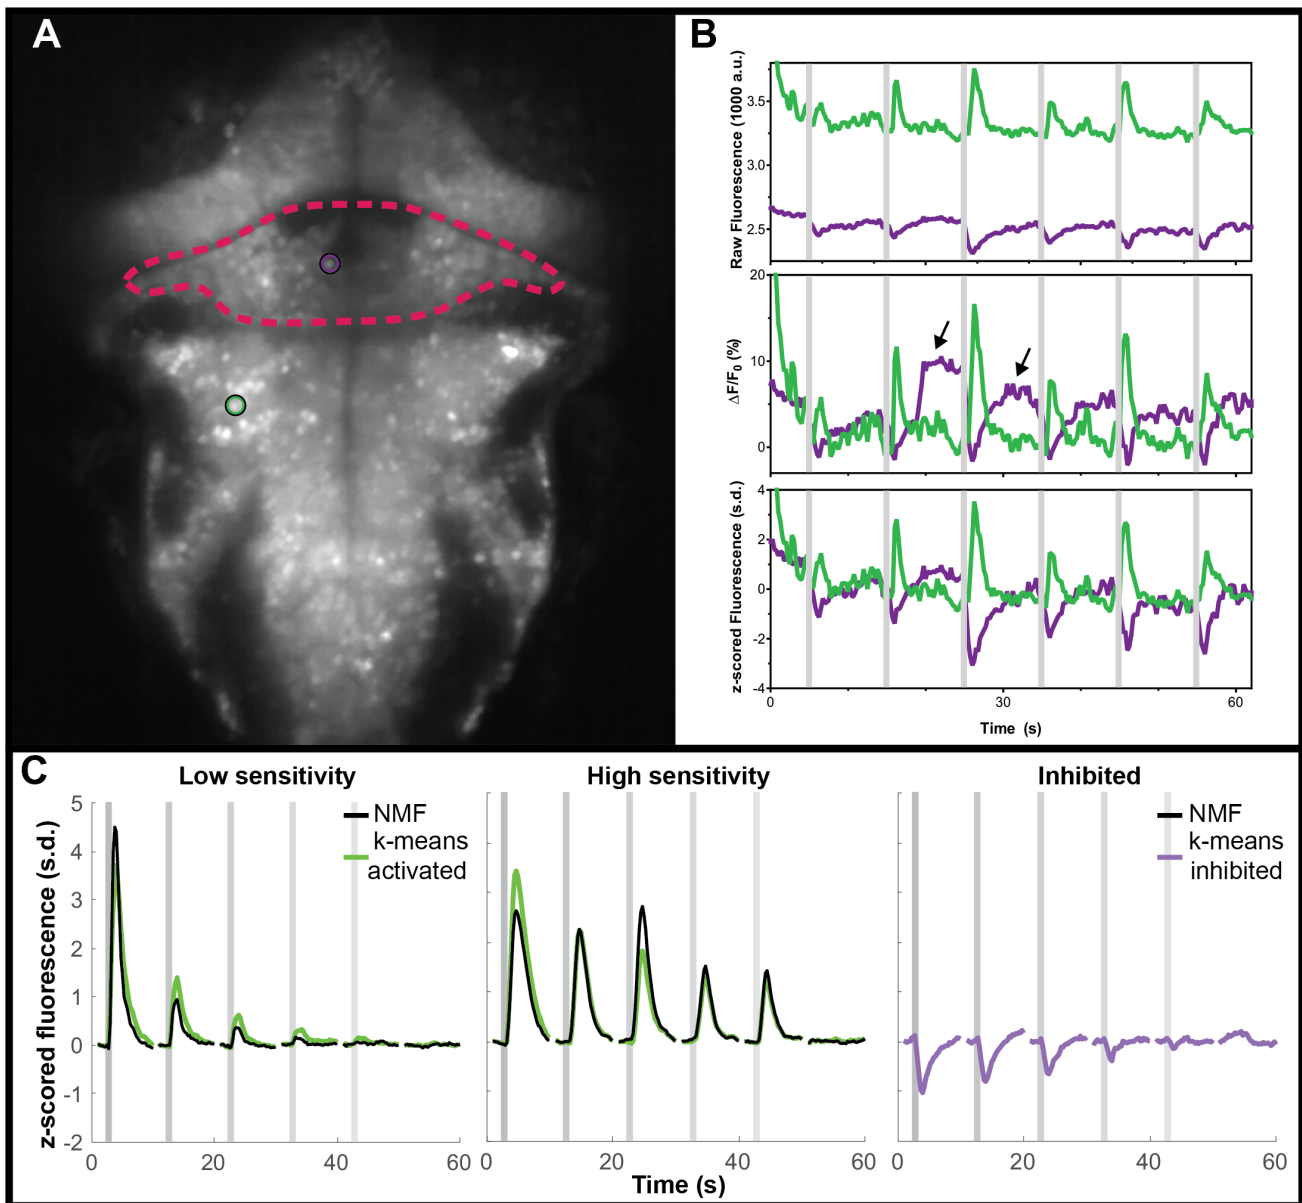

**Figure 1: Negative deviations from baseline in real data from the cerebellum of zebrafish, and performance of various analysis tools.**

(A) Mean fluorescence image of a 6 dpf zebrafish expressing nuclear-targeted GCaMP6s (Chen, Wardill et al. 2013). The cerebellum is outlined in red, and an inhibited neuron is indicated with a magenta circle. The green circle indicates an activated neuron in the hindbrain. (B) Time traces of the raw (top),  $\Delta F/F_0$  (middle) or z-scored (bottom) fluorescence for these two neurons, in their respective colors. Arrows indicate artefactual positive deviations resulting from the cessation of inhibition on the inhibited neuron. (C) Comparisons between the clusters identified using k-means (green for activated, magenta for inhibited) and those identified with NMF (black). No inhibited cluster was identified by NMF. Grey shaded areas indicate the time of vestibular stimulation (Favre-Bulle, Vanwalleghem et al. 2018), with a progression from strong to weak stimuli across the stimulus train.

123  
124  
125  
126  
127  
128  
129  
130  
131  
132  
133  
134  
135

Our first observation is that the classical  $\Delta F/F_0$  approach with a moving baseline window (Akerboom, Chen et al. 2012) creates positive artefacts following negative deviation from baseline as seen in Fig.1B (arrows). These positive artefacts could be construed as actual responses by some approaches, since they peak at the same level as the actual responses (magenta traces with arrows

136  
137  
138  
139

140 versus adjacent green traces in Fig. 1B). In the  $\Delta F/F_0$  trace, the results do not correlate as well for the  
141 (magenta) inhibited neuron ( $\rho=0.599$ ) when compared to the (green) activated neuron ( $\rho=0.979$ ).  
142 However, the z-scored trace is perfectly correlated to the raw trace ( $\rho=1$ ) for both neurons. As such,  
143 we recommend the use of z-score as a normalization of calcium traces, and we will use this  
144 normalization in the following analysis.

145 An additional hurdle when working with inhibited neurons in big datasets is the risk that the data  
146 analysis methods could miss inhibited response profiles. NMF has been used to analyze larval  
147 zebrafish calcium imaging data (Mu, Bennett et al. 2019, Torigoe, Islam et al. 2019), so we tested  
148 this method on our the same vestibular dataset from our group (Favre-Bulle, Vanwalleghem et al.  
149 2018). As can be seen (Sup.Fig.1) the NMF approach failed to identify responses resembling the  
150 inhibited cluster identified by k-means while the other (non-negative) clusters were found with a high  
151 correlation ( $\rho=0.92$ ,  $\rho=0.94$  respectively, Fig.1C).

152 The major limitation of this analysis is that it lacks a ground truth, making it impossible to judge  
153 whether outputs from apparently successful approaches actually reflect physiology. To solve this  
154 problem, we turned to simulated data for which we know the ground truth.

### 155 3.2 Simulated data

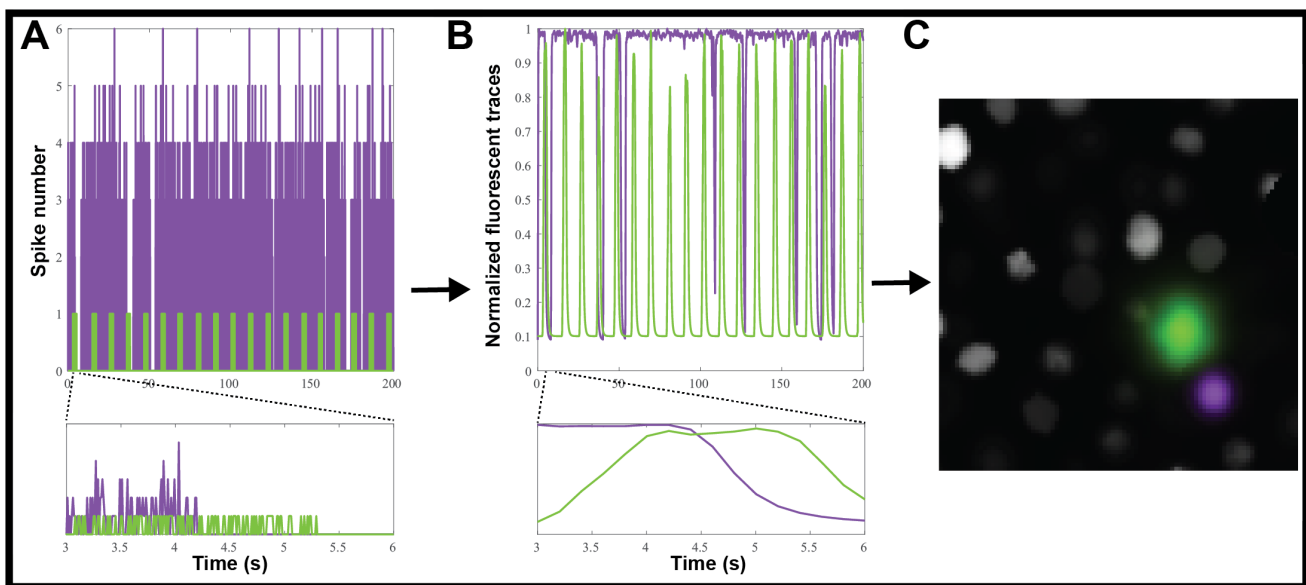

156

#### 157 **Figure 2: Creating simulated calcium imaging datasets**

158 (A) An example simulated activity, showing spike numbers for one neuron (green) activated and one  
159 (magenta) inhibited by a hypothetical stimulus. (B) The spike trains are convolved with a GCaMP6f  
160 kernel and noise to generate fluorescence traces. (C) The simulated neuronal activity is used to create  
161 an artificial movie as captured by a microscope.

162

163 We used the Neural Anatomy and Optical Microscopy (NAOMi) Simulation toolbox (Charles, Song  
164 et al. 2019) to generate 10 datasets of simulated nuclear-targeted GCaMP6f data, as described in the  
165 Materials and Methods. Briefly, each dataset contained about 90 neurons, and for each we randomly  
166 selected either 10% or 20% of the neurons to be inhibited. For each inhibited neuron, we simulated  
167 tonic firing, based on an observed Poisson distribution (Baddeley, Abbott et al. 1997), which was

168 randomly interrupted for 0.2 to 5s to simulate inhibition (Fig.2A). We chose a random inhibition as  
169 both suite2p and CaImAn depend on the correlation between pixels to generate the ROIs, and we  
170 wanted to make the inhibited neurons as easy to identify as possible, since most methods depend on  
171 local correlations to identify the neurons. The simulated spiking (Fig.2A) was then convolved with a  
172 GCaMP6f kernel to simulate neural activity (Fig.2B), which was then used to generate movies by  
173 NAOMi (Fig.2C). As most simulated neurons would be below the detection threshold, we used  
174 NAOMi to output the ideal responses corresponding to what would be detected with a microscope.  
175 While other algorithms occasionally identified additional neurons, the effect was marginal (<1%), so  
176 we decided to use the ideal responses as ground truth for the sake of simplicity (Charles, Song et al.  
177 2019).

178 Each fluorescence dataset was processed through suite2p (Pachitariu, Stringer et al. 2017), CaImAn  
179 (Giovannucci, Friedrich et al. 2019), or CellSort (Mukamel, Nimmerjahn et al. 2009) and the outputs  
180 were analyzed in the exact same way. We did not investigate if either suite2p default classifier or  
181 CaImAn components evaluation would exclude inhibited neurons, as such we kept all the ROIs either  
182 algorithm identified. The raster plots of the ten datasets (Fig.3A) show that CaImAn identifies the  
183 highest number of ROIs, with CellSort and suite2p identifying a similar number of ROIs (Ideal =  
184  $94.3 \pm 4.7$ , CaImAn =  $84.7 \pm 14.4$ , CellSort =  $55.5 \pm 3.8$ , suite2p =  $56.1 \pm 4.7$ ).

185 The segmentation of the simulated fluorescent movies gave good results for all three algorithms with  
186 well-defined regions of interest that correlated well with the ideal ROIs (Fig.3B-C,  $\rho=0.74 \pm 0.06$ ,  
187  $\rho=0.80 \pm 0.02$ ,  $\rho=0.79 \pm 0.03$ ). We then correlated the ideal traces of activated or inhibited simulated  
188 neurons to the traces extracted by each algorithm, for each dataset, we averaged the maximum  
189 correlations to each ideal trace (Fig.3D). We can see that all three algorithms succeeded in extracting  
190 the relevant traces for the activated neurons (Fig.3D, left, indicated by green bar), but CellSort and  
191 suite2p outperformed CaImAn for the inhibited traces ( $\rho=0.82 \pm 0.07$ ,  $\rho=0.83 \pm 0.08$ ,  $\rho=0.43 \pm 0.09$   
192 respectively, Fig.3D, right, magenta).

193 To assess the proportion of true positives, we identified the ideal fluorescent trace to which each  
194 ROI's fluorescent trace best correlated. We only counted the unique ROIs that passed a 0.5  
195 correlation cutoff, as all algorithms were shown to over-segment some of the sources in duplicated  
196 fluorescent traces (Charles, Song et al. 2019). When comparing the proportions of identified ideal  
197 activated neurons, CellSort outperformed suite2p slightly, followed by CaImAn (proportions of  
198  $0.58 \pm 0.06$ ,  $0.54 \pm 0.04$  and  $0.38 \pm 0.05$  respectively, Fig. 2E left). For inhibited neurons, CellSort  
199 outperformed suite2p slightly again, but the divide with CaImAn grew (proportions of  $0.86 \pm 0.10$ ,  
200  $0.82 \pm 0.10$  and  $0.34 \pm 0.19$  respectively, Fig.2E right). All algorithms seemed insensitive to the ratio of  
201 inhibited neurons present, as we saw no difference in those metrics between datasets with either 10 or  
202 20% of inhibited neurons.

203 These results are lower than the results from (Charles, Song et al. 2019), who found that both  
204 CaImAn and suite2p outperformed CellSort (proportions of 0.71, 0.69 and 0.33 respectively). One  
205 possible explanation for the difference is that our use of nuclear-targeted GCaMP simulations, like  
206 our real datasets, may favor CellSort.

207

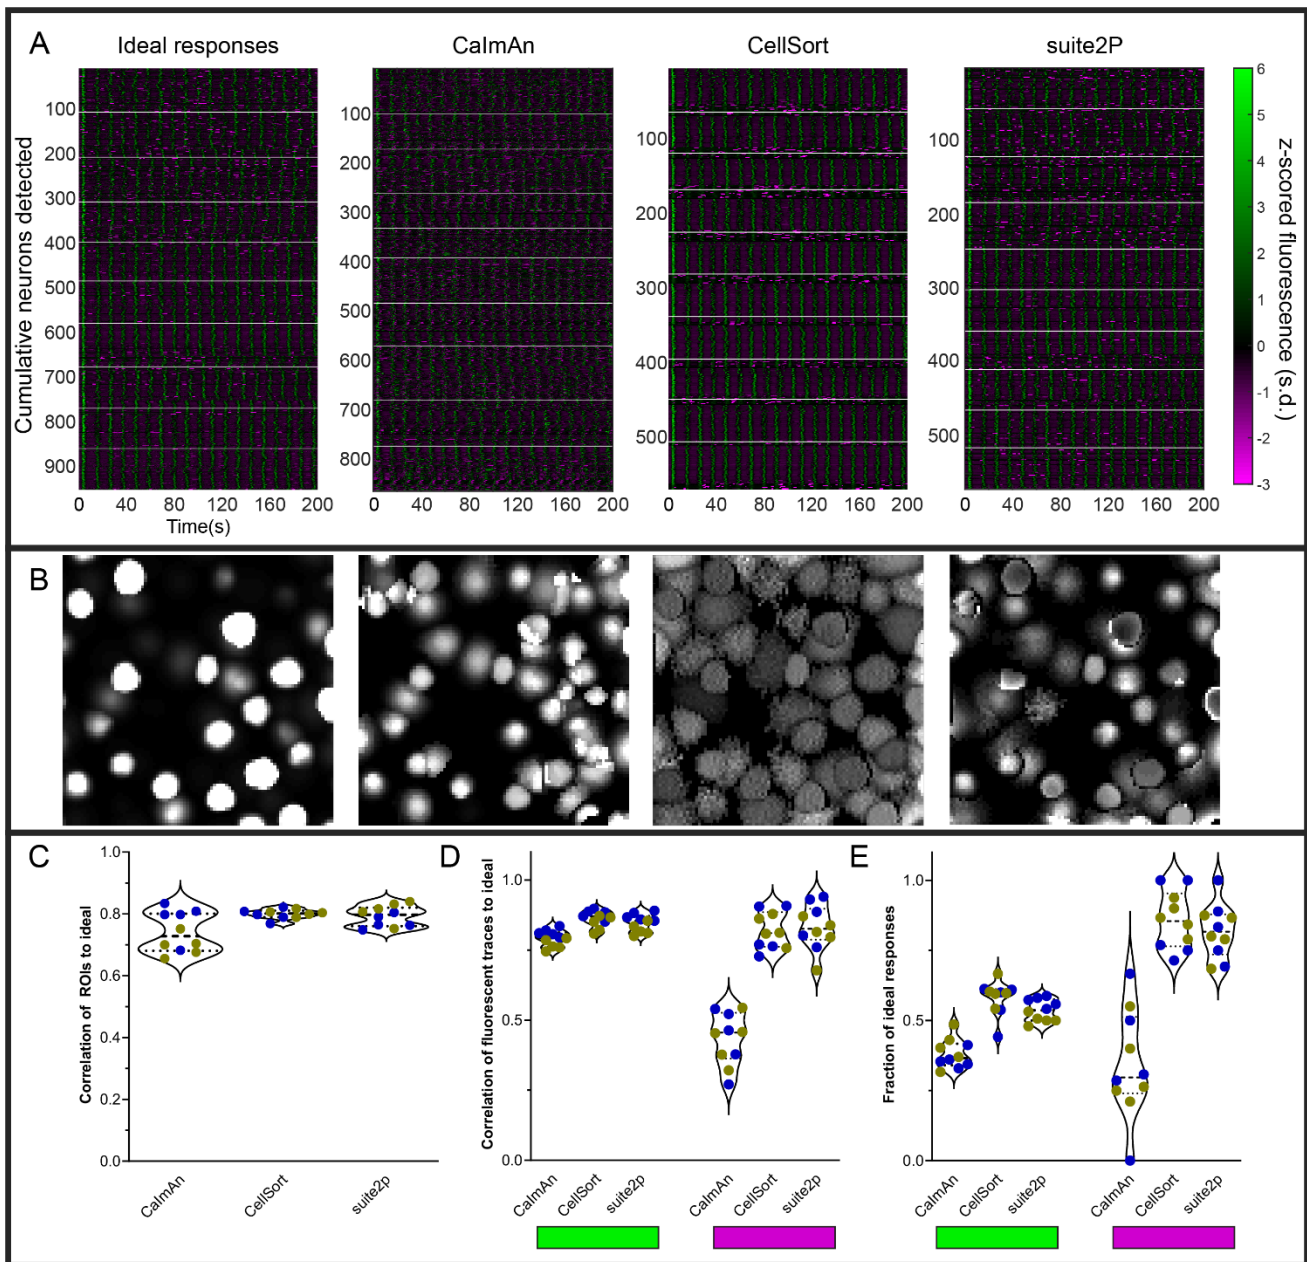

208

209 **Figure 3: Various analyses' performances on simulated data.**

210 (A) Raster plots of ideal responses from NAOMi, and extracted fluorescence traces from CalmAn,  
 211 CellSort and suite2p. All the fluorescent traces were z-scored from -3 to 6 s.d. White horizontal lines  
 212 separate the individual datasets. (B) Segmentation of the regions of interest (ROIs) by each algorithm  
 213 for one representative dataset. (C) Quantification of the correlation between the ROIs identified by  
 214 each of the three algorithms and the ideal ROIs. Symbol color indicate the percentage of inhibited  
 215 neurons (n=5 datasets with 10% inhibited neurons in blue, and n=5 datasets with 20% inhibited  
 216 neurons in yellow) (D) Average maximum correlations between the traces identified by each  
 217 algorithm and the ideal responses for the activated neurons (left, green rectangle) and the inhibited  
 218 neurons (right, magenta rectangle). (E) Fraction of the ideal responses identified with a correlation  
 219 above 0.5 by the three algorithms for the activated neurons (left) and the inhibited neurons (right).

220

### 221 3.3 Spike inference from simulated calcium traces

222 In theory, inferring the spike trains responsible for the calcium traces is one way to improve the  
 223 temporal resolution, as you get rid of the convolved GCaMP kernel. But the frame rate of acquisition  
 224 often makes such deconvolution impractical and unreliable. Each of the above algorithms offers  
 225 some form of spike inference (Fig.4A), and multiple other approaches have been proposed during an  
 226 online challenge (Berens, Freeman et al. 2018). CaImAn offers multiple options for spike inference,  
 227 among which we selected their fast non-negative deconvolution (FOOPSI) method (Vogelstein,  
 228 Packer et al. 2010). For suite2p, we used the Online Active Set method to Infer Spikes (OASIS)  
 229 (Friedrich, Zhou et al. 2017). We also tested a recent spike inference method based on deep learning,  
 230 CASCADE, which offers universal pre-trained models (Rupprecht, Carta et al. 2020).

231 Using this approach, we tested how accurate each spike detection algorithm is on our datasets. To  
 232 avoid any confounding issues from the detection algorithm, we used the ideal calcium responses as  
 233 the basis for the spike detection. Based on our results with the moving baseline of  $\Delta F/F_0$  (Fig.1B), we  
 234 also did not pre-process the data for the spike inference with suite2p. The CellSort deconvolution  
 235 approach had limited success with both activated and inhibited neurons ( $\rho=0.08\pm 0.08$ , and  
 236  $\rho=0.003\pm 0.013$  respectively, Fig.4B, Sup.Fig.2). The more recent CaImAn and suite2p did well for  
 237 the activated neurons, ( $\rho=0.53\pm 0.04$ ,  $\rho=0.55\pm 0.03$  respectively), but suite2p performance was less  
 238 good for inhibited neurons ( $\rho=0.37\pm 0.03$ ) compared to CaImAn ( $\rho=0.60\pm 0.05$ ). The universal model  
 239 of CASCADE performed better than the rest on the activated neurons ( $\rho=0.66\pm 0.03$ ), but worse on  
 240 the inhibited neurons ( $\rho=0.03\pm 0.03$ ).

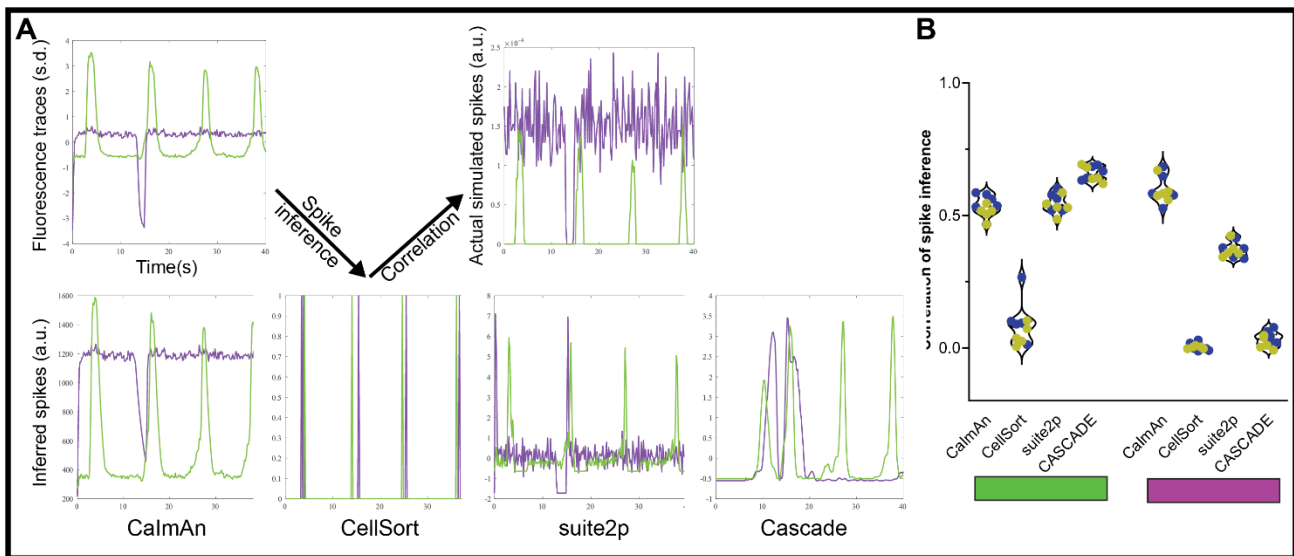

241

### 242 Figure 4: Spike inference from simulated calcium traces

243 (A) We used each of three methods to infer spikes from our simulated GECI fluorescence data, and  
 244 compared these results to the ground truth of the actual simulated spikes used to produce our  
 245 fluorescence data. (B) Correlation between the inferred spikes from the simulated calcium traces and  
 246 the actual spikes for the activated neurons (left, green rectangle) and the inhibited neurons (right,  
 247 magenta rectangle). Each datapoint represents the performance on one simulated dataset ( $n=5$   
 248 datasets with 10% inhibited neurons in blue, and  $n=5$  datasets with 20% inhibited neurons in yellow).

249



## 250 4 Discussion

251 In this study, we show that the often implicit assumption of non-negativity for calcium imaging data  
252 can lead to missing real responses from inhibited neurons. Current approaches run the risk of missing  
253 a significant fraction of responses at every step of the analysis pipeline, including cleaning the data,  
254 processing, feature extraction, dimensionality reduction, and clustering.

255 We have shown these negative deviations exist in real data from zebrafish, as we previously observed  
256 (Fig.1), and as observed in mice (Favre-Bulle, Vanwalleghem et al. 2018, Steinmetz, Zatka-Haas et  
257 al. 2019). We detected inhibition of tonically active vestibular neurons in the cerebellum, which may  
258 correlate to Golgi interneurons (which are responsive to tonically inhibited granule neurons) or  
259 basket and stellate interneurons (which inhibit Purkinje neurons) (Leto, Arancillo et al. 2016). Based  
260 on the dorsal position of the cell in Figure 1, they are likely stellate or basket interneurons in the  
261 superficial-most molecular layer of the cerebellum that synapse onto Purkinje neurons.

262 We have demonstrated that a moving baseline, such as for  $\Delta F/F_0$ , may create artefacts in inhibited  
263 neurons, which may lead to spurious generation of positive signals. Finally, inhibited responses can  
264 also be lost when using NMF or thresholding approaches to analyze and visualize the data (Fig.1C).  
265 It would be interesting to revisit the data from studies that used these approaches (Mu, Bennett et al.  
266 2019, Torigoe, Islam et al. 2019) to see whether inhibited neurons are present in the datasets. We  
267 suggest that an initial unbiased step of data exploration of the dataset should be performed to ensure  
268 that no inhibited responses are present before pursuing steps including the above methods that  
269 assume non-negativity. Principal component analysis, or other dimensionality reduction tools, could  
270 be used to explore the data in the case of spontaneous activity or complex stimuli. Alternatively, for  
271 stimuli-driven activity, a correlation or linear regression should reveal any neuronal activity that  
272 deviates negatively from baseline.

273 By using simulated data (Fig.2), we tested how reliably CellSort, suite2p and CaImAn could detect  
274 inhibited neurons in a calcium imaging dataset. CellSort was the best algorithm in our specific  
275 analysis of nuclear-targeted GCaMP (Fig.3), which is at odds with other comparisons (Charles, Song  
276 et al. 2019). However, both CaImAn and suite2p are better suited to larger datasets of thousands of  
277 neurons. Between these two approaches, suite2p outperformed CaImAn for the detection of activated  
278 responses both in terms of the fidelity of the extracted response (Fig3.D, mean difference of 0.056  
279 and p-value=0.0006) and the fraction of responses identified (Fig3.E, mean difference of 0.16 and p-  
280 value<0.0001). For inhibited responses, suite2p largely outperformed CaImAn with more than twice  
281 the fraction of ideal inhibited responses recovered (mean difference=0.47 and p-value<0.0001).  
282 Among the currently available approaches, we therefore favor suite2p, or CellSort for smaller  
283 datasets, in order to recover the most inhibited responses from calcium imaging of neuronal activity.

284 As for the spike inference, the algorithm included with CellSort did poorly on both activated and  
285 inhibited neurons. The more recent suite2p and CaImAn performed similarly to one another with  
286 activated neurons, in line with published results (Pachitariu, Stringer et al. 2018). However, for  
287 inhibited responses, suite2p's performance collapsed when using OASIS. CASCADE performed well  
288 on the activated neurons, but the lack of inhibited neurons in the training datasets mean it performed  
289 poorly when detecting our inhibited responses, as such the use of a more varied training dataset could  
290 improve its performance. Overall CaImAn presents the best approach to infer spikes from inhibited  
291 neurons. Several other methods of spike inference have been benchmarked (Berens, Freeman et al.  
292 2018), and it would be interesting to benchmark these with simulated inhibited neurons. We saw no  
293 significant differences between simulated datasets with 10% or 20% inhibited neurons in any of the

294 above metrics, showing that the amount of inhibited neurons should not affect the detection of the  
295 activated neurons.

296 Overall, we suggest that the PCA/ICA approach, such as implemented in CellSort should be favored  
297 when dealing with smaller datasets and nuclear-targeted GECIs. For larger datasets however, we  
298 suggest using suite2p, which has worked well both with nuclear-targeted simulations in this study,  
299 and with a cytoplasmic GECI simulation (Charles, Song et al. 2019). When attempting spike  
300 inference, we got the best results from the FOOPSI approach, so we would favor this method when  
301 inferring spikes.

302 In summary, we have shown that assumptions of non-negativity can lead to the omission of real and  
303 simulated inhibited responses, and can produce spurious positive signals during the analysis of neural  
304 calcium imaging datasets. We have tested three popular and readily available approaches for  
305 analyzing such data, and provide recommendations for the best approaches to use when analyzing  
306 calcium imaging data that may contain inhibited signals.

## 307 **5 Tables**

308 **Table 1: Parameters used for the simulation of calcium datasets**

| Frame rate | Simulated volume | Radius nuclei | $\tau$ of GECI | Time points |
|------------|------------------|---------------|----------------|-------------|
| 5Hz        | 90 x 90 x 50     | 5.9 $\mu$ m   | 1.5            | 1000        |

## 309 **6 Conflict of Interest**

310 *The authors declare that the research was conducted in the absence of any commercial or financial*  
311 *relationships that could be construed as a potential conflict of interest.*

## 312 **7 Author Contributions**

313 GV, LC and EKS contributed conception and design of the study; GV performed the statistical  
314 analysis; GV and LC wrote the first draft of the manuscript; GV, LC and EKS wrote sections of the  
315 manuscript. All authors contributed to manuscript revision, read, and approved the submitted version.

## 316 **8 Funding**

317 Support was provided by an NHMRC Project Grant (APP1066887) and three ARC Discovery Project  
318 Grants (DP140102036, DP110103612, and DP190103430) to E.K.S., and EMBO Long-term  
319 Fellowship to G.V.

## 320 **9 Acknowledgments**

321 We thank Itia A. Favre-Bulle for data and the Vulcans who remind us “Challenge your  
322 preconceptions, or they will challenge you”. We thank C. Stringer and P. Rupprecht for helpful  
323 discussions and comments on the manuscript.

324

## 325 **10 Data Availability Statement**

326 The datasets generated and analyzed for this study can be found in the UQ espace,  
327 doi:10.14264/63584b3.

## 328 **11 References**

- 329 Ahrens, M. B., J. M. Li, M. B. Orger, D. N. Robson, A. F. Schier, F. Engert and R. Portugues (2012).  
330 "Brain-wide neuronal dynamics during motor adaptation in zebrafish." *Nature* **485**(7399): 471-477.
- 331 Akerboom, J., T. W. Chen, T. J. Wardill, L. Tian, J. S. Marvin, S. Mutlu, N. C. Calderon, F. Esposti,  
332 B. G. Borghuis, X. R. Sun, A. Gordus, M. B. Orger, R. Portugues, F. Engert, J. J. Macklin, A. Filosa,  
333 A. Aggarwal, R. A. Kerr, R. Takagi, S. Kracun, E. Shigetomi, B. S. Khakh, H. Baier, L. Lagnado, S.  
334 S. Wang, C. I. Bargmann, B. E. Kimmel, V. Jayaraman, K. Svoboda, D. S. Kim, E. R. Schreiter and  
335 L. L. Looger (2012). "Optimization of a GCaMP calcium indicator for neural activity imaging." *J*  
336 *Neurosci* **32**(40): 13819-13840.
- 337 Baddeley, R., L. F. Abbott, M. C. Booth, F. Sengpiel, T. Freeman, E. A. Wakeman and E. T. Rolls  
338 (1997). "Responses of neurons in primary and inferior temporal visual cortices to natural scenes."  
339 *Proc Biol Sci* **264**(1389): 1775-1783.
- 340 Balaji, R., C. Bielmeier, H. Harz, J. Bates, C. Stadler, A. Hildebrand and A. K. Classen (2017).  
341 "Calcium spikes, waves and oscillations in a large, patterned epithelial tissue." *Sci Rep* **7**: 42786.
- 342 Berens, P., J. Freeman, T. Deneux, N. Chenkov, T. McColgan, A. Speiser, J. H. Macke, S. C. Turaga,  
343 P. Mineault, P. Rupprecht, S. Gerhard, R. W. Friedrich, J. Friedrich, L. Paninski, M. Pachitariu, K.  
344 D. Harris, B. Bolte, T. A. Machado, D. Ringach, J. Stone, L. E. Rogerson, N. J. Sofroniew, J.  
345 Reimer, E. Froudarakis, T. Euler, M. Roman Roson, L. Theis, A. S. Tolias and M. Bethge (2018).  
346 "Community-based benchmarking improves spike rate inference from two-photon calcium imaging  
347 data." *PLoS Comput Biol* **14**(5): e1006157.
- 348 Cai, D. J., D. Aharoni, T. Shuman, J. Shobe, J. Biane, W. Song, B. Wei, M. Veshkini, M. La-Vu, J.  
349 Lou, S. E. Flores, I. Kim, Y. Sano, M. Zhou, K. Baumgaertel, A. Lavi, M. Kamata, M. Tuszynski, M.  
350 Mayford, P. Golshani and A. J. Silva (2016). "A shared neural ensemble links distinct contextual  
351 memories encoded close in time." *Nature* **534**(7605): 115-118.
- 352 Charles, A. S., A. Song, J. L. Gauthier, J. W. Pillow and D. W. Tank (2019). "Neural Anatomy and  
353 Optical Microscopy (NAOMi) Simulation for evaluating calcium imaging methods." *bioRxiv*:  
354 726174.
- 355 Chen, Q., J. Cichon, W. Wang, L. Qiu, S. J. Lee, N. R. Campbell, N. Destefino, M. J. Goard, Z. Fu,  
356 R. Yasuda, L. L. Looger, B. R. Arenkiel, W. B. Gan and G. Feng (2012). "Imaging neural activity  
357 using Thy1-GCaMP transgenic mice." *Neuron* **76**(2): 297-308.
- 358 Chen, T. W., T. J. Wardill, Y. Sun, S. R. Pulver, S. L. Renninger, A. Baohan, E. R. Schreiter, R. A.  
359 Kerr, M. B. Orger, V. Jayaraman, L. L. Looger, K. Svoboda and D. S. Kim (2013). "Ultrasensitive  
360 fluorescent proteins for imaging neuronal activity." *Nature* **499**(7458): 295-300.
- 361 Constantin, L., R. E. Poulsen, L. A. Scholz, I. A. Favre-Bulle, M. A. Taylor, B. Sun, G. J. Goodhill,  
362 G. C. Vanwalleghem and E. K. Scott (2020). "Altered brain-wide auditory networks in a zebrafish  
363 model of fragile X syndrome." *BMC Biology* **18**(1): 125.
- 364 Cullen, K. E. and R. A. McCrea (1993). "Firing behavior of brain stem neurons during voluntary  
365 cancellation of the horizontal vestibuloocular reflex. I. Secondary vestibular neurons." *J*  
366 *Neurophysiol* **70**(2): 828-843.

- 367 Daviu, N., T. Fuzesi, D. G. Rosenegger, N. P. Rasiah, T. L. Sterley, G. Peringod and J. S. Bains  
368 (2020). "Paraventricular nucleus CRH neurons encode stress controllability and regulate defensive  
369 behavior selection." *Nat Neurosci* **23**(3): 398-410.
- 370 Etter, G., F. Manseau and S. Williams (2020). "A Probabilistic Framework for Decoding Behavior  
371 From in vivo Calcium Imaging Data." *Front Neural Circuits* **14**: 19.
- 372 Favre-Bulle, I. A., A. B. Stilgoe, H. Rubinsztein-Dunlop and E. K. Scott (2017). "Optical trapping of  
373 otoliths drives vestibular behaviours in larval zebrafish." *Nat Commun* **8**(1): 630.
- 374 Favre-Bulle, I. A., A. B. Stilgoe, E. K. Scott and H. Rubinsztein-Dunlop (2019). "Optical trapping in  
375 vivo: theory, practice, and applications." *Nanophotonics* **8**(6): 1023-1040.
- 376 Favre-Bulle, I. A., M. A. Taylor, E. Marquez-Legorreta, G. Vanwalleghem, R. E. Poulsen, H.  
377 Rubinsztein-Dunlop and E. K. Scott (2020). "Sound generation in zebrafish with Bio-Opto-Acoustics  
378 (BOA)." *bioRxiv*: 2020.2006.2009.143362.
- 379 Favre-Bulle, I. A., G. Vanwalleghem, M. A. Taylor, H. Rubinsztein-Dunlop and E. K. Scott (2018).  
380 "Cellular-Resolution Imaging of Vestibular Processing across the Larval Zebrafish Brain." *Curr Biol*  
381 **28**(23): 3711-3722 e3713.
- 382 Freeman, J., N. Vladimirov, T. Kawashima, Y. Mu, N. J. Sofroniew, D. V. Bennett, J. Rosen, C. T.  
383 Yang, L. L. Looger and M. B. Ahrens (2014). "Mapping brain activity at scale with cluster  
384 computing." *Nat Methods* **11**(9): 941-950.
- 385 Friedrich, J., P. Zhou and L. Paninski (2017). "Fast online deconvolution of calcium imaging data."  
386 *PLoS Comput Biol* **13**(3): e1005423.
- 387 Giovannucci, A., J. Friedrich, P. Gunn, J. Kalfon, B. L. Brown, S. A. Koay, J. Taxidis, F. Najafi, J. L.  
388 Gauthier, P. Zhou, B. S. Khakh, D. W. Tank, D. B. Chklovskii and E. A. Pnevmatikakis (2019).  
389 "CaImAn an open source tool for scalable calcium imaging data analysis." *Elife* **8**.
- 390 Heap, L. A. L., G. Vanwalleghem, A. W. Thompson, I. A. Favre-Bulle and E. K. Scott (2018).  
391 "Luminance Changes Drive Directional Startle through a Thalamic Pathway." *Neuron* **99**(2): 293-301  
392 e294.
- 393 Klioutchnikov, A., D. J. Wallace, M. H. Frosz, R. Zeltner, J. Sawinski, V. Pawlak, K. M. Voit, P. S.  
394 J. Russell and J. N. D. Kerr (2020). "Three-photon head-mounted microscope for imaging deep  
395 cortical layers in freely moving rats." *Nat Methods* **17**(5): 509-513.
- 396 Kubo, F., B. Hablitzel, M. Dal Maschio, W. Driever, H. Baier and A. B. Arrenberg (2014).  
397 "Functional architecture of an optic flow-responsive area that drives horizontal eye movements in  
398 zebrafish." *Neuron* **81**(6): 1344-1359.
- 399 Leto, K., M. Arancillo, E. B. Becker, A. Buffo, C. Chiang, B. Ding, W. B. Dobyns, I. Dusart, P.  
400 Haldipur, M. E. Hatten, M. Hoshino, A. L. Joyner, M. Kano, D. L. Kilpatrick, N. Koibuchi, S.  
401 Marino, S. Martinez, K. J. Millen, T. O. Millner, T. Miyata, E. Parmigiani, K. Schilling, G.  
402 Sekerkova, R. V. Sillitoe, C. Sotelo, N. Uesaka, A. Wefers, R. J. Wingate and R. Hawkes (2016).  
403 "Consensus Paper: Cerebellar Development." *Cerebellum* **15**(6): 789-828.
- 404 Marquez-Legorreta, E., L. Constantin, M. Piber, I. A. Favre-Bulle, M. A. Taylor, G. C.  
405 Vanwalleghem and E. Scott (2019). "Brain-wide visual habituation networks in wild type and  
406 <em>fmr1</em> zebrafish." *bioRxiv*: 722074.
- 407 Mu, Y., D. V. Bennett, M. Rubinov, S. Narayan, C. T. Yang, M. Tanimoto, B. D. Mensh, L. L.  
408 Looger and M. B. Ahrens (2019). "Glia Accumulate Evidence that Actions Are Futile and Suppress  
409 Unsuccessful Behavior." *Cell* **178**(1): 27-43 e19.

- 410 Mukamel, E. A., A. Nimmerjahn and M. J. Schnitzer (2009). "Automated analysis of cellular signals  
411 from large-scale calcium imaging data." *Neuron* **63**(6): 747-760.
- 412 Nakai, J., M. Ohkura and K. Imoto (2001). "A high signal-to-noise Ca(2+) probe composed of a  
413 single green fluorescent protein." *Nat Biotechnol* **19**(2): 137-141.
- 414 Naumann, E. A., J. E. Fitzgerald, T. W. Dunn, J. Rihel, H. Sompolinsky and F. Engert (2016). "From  
415 Whole-Brain Data to Functional Circuit Models: The Zebrafish Optomotor Response." *Cell* **167**(4):  
416 947-960 e920.
- 417 Pachitariu, M., C. Stringer, M. Dipoppa, S. Schröder, L. F. Rossi, H. Dalgleish, M. Carandini and K.  
418 D. Harris (2017). "Suite2p: beyond 10,000 neurons with standard two-photon microscopy." *bioRxiv*:  
419 061507.
- 420 Pachitariu, M., C. Stringer and K. D. Harris (2018). "Robustness of Spike Deconvolution for  
421 Neuronal Calcium Imaging." *J Neurosci* **38**(37): 7976-7985.
- 422 Pologruto, T. A., R. Yasuda and K. Svoboda (2004). "Monitoring neural activity and [Ca<sup>2+</sup>] with  
423 genetically encoded Ca<sup>2+</sup> indicators." *J Neurosci* **24**(43): 9572-9579.
- 424 Rupprecht, P., S. Carta, A. Hoffmann, M. Echizen, K. Kitamura, F. Helmchen and R. W. Friedrich  
425 (2020). "A deep learning toolbox for noise-optimized, generalized spike inference from calcium  
426 imaging data." *bioRxiv*: 2020.2008.2031.272450.
- 427 Shannon, E. K., A. Stevens, W. Edrington, Y. Zhao, A. K. Jayasinghe, A. Page-McCaw and M. S.  
428 Hutson (2017). "Multiple Mechanisms Drive Calcium Signal Dynamics around Laser-Induced  
429 Epithelial Wounds." *Biophys J* **113**(7): 1623-1635.
- 430 Shimazu, H. and W. Precht (1965). "Tonic and kinetic responses of cat's vestibular neurons to  
431 horizontal angular acceleration." *J Neurophysiol* **28**(6): 991-1013.
- 432 Shimazu, H. and W. Precht (1966). "Inhibition of central vestibular neurons from the contralateral  
433 labyrinth and its mediating pathway." *J Neurophysiol* **29**(3): 467-492.
- 434 Steinmetz, N. A., P. Zatzka-Haas, M. Carandini and K. D. Harris (2019). "Distributed coding of  
435 choice, action and engagement across the mouse brain." *Nature* **576**(7786): 266-273.
- 436 Stevenson, A. J., G. Vanwalleghem, T. A. Stewart, N. D. Condon, B. Lloyd-Lewis, N. Marino, J. W.  
437 Putney, E. K. Scott, A. D. Ewing and F. M. Davis (2020). "Multiscale activity imaging in the  
438 mammary gland reveals how oxytocin enables lactation." *bioRxiv*: 657510.
- 439 Stringer, C. and M. Pachitariu (2019). "Computational processing of neural recordings from calcium  
440 imaging data." *Curr Opin Neurobiol* **55**: 22-31.
- 441 Suh, G. S., A. M. Wong, A. C. Hergarden, J. W. Wang, A. F. Simon, S. Benzer, R. Axel and D. J.  
442 Anderson (2004). "A single population of olfactory sensory neurons mediates an innate avoidance  
443 behaviour in *Drosophila*." *Nature* **431**(7010): 854-859.
- 444 Taylor, M. A., G. C. Vanwalleghem, I. A. Favre-Bulle and E. K. Scott (2018). "Diffuse light-sheet  
445 microscopy for stripe-free calcium imaging of neural populations." *J Biophotonics* **11**(12):  
446 e201800088.
- 447 Theis, L., P. Berens, E. Froudarakis, J. Reimer, M. Roman Roson, T. Baden, T. Euler, A. S. Tolias  
448 and M. Bethge (2016). "Benchmarking Spike Rate Inference in Population Calcium Imaging."  
449 *Neuron* **90**(3): 471-482.
- 450 Tian, J., C. Tep, M. X. Zhu and S. O. Yoon (2013). "Changes in Spontaneous firing patterns of  
451 cerebellar Purkinje cells in p75 knockout mice." *Cerebellum* **12**(3): 300-303.

- 452 Tian, L., S. A. Hires, T. Mao, D. Huber, M. E. Chiappe, S. H. Chalasani, L. Petreanu, J. Akerboom,  
453 S. A. McKinney, E. R. Schreiter, C. I. Bargmann, V. Jayaraman, K. Svoboda and L. L. Looger  
454 (2009). "Imaging neural activity in worms, flies and mice with improved GCaMP calcium  
455 indicators." *Nat Methods* **6**(12): 875-881.
- 456 Torigoe, M., T. Islam, H. Kakinuma, C. C. A. Fung, T. Isomura, H. Shimazaki, T. Aoki, T. Fukai and  
457 H. Okamoto (2019). "Future state prediction errors guide active avoidance behavior by adult  
458 zebrafish." *bioRxiv*: 546440.
- 459 Vanwalleghe, G., K. Schuster, M. A. Taylor, I. A. Favre-Bulle and E. K. Scott (2020). "Brain-Wide  
460 Mapping of Water Flow Perception in Zebrafish." *J Neurosci* **40**(21): 4130-4144.
- 461 Vogelstein, J. T., A. M. Packer, T. A. Machado, T. Sippy, B. Babadi, R. Yuste and L. Paninski  
462 (2010). "Fast nonnegative deconvolution for spike train inference from population calcium imaging."  
463 *J Neurophysiol* **104**(6): 3691-3704.
- 464 Wang, J. W., A. M. Wong, J. Flores, L. B. Vosshall and R. Axel (2003). "Two-photon calcium  
465 imaging reveals an odor-evoked map of activity in the fly brain." *Cell* **112**(2): 271-282.
- 466 Wyart, C., F. Del Bene, E. Warp, E. K. Scott, D. Trauner, H. Baier and E. Y. Isacoff (2009).  
467 "Optogenetic dissection of a behavioural module in the vertebrate spinal cord." *Nature* **461**(7262):  
468 407-410.
- 469 Zimmerman, C. A., E. L. Huey, J. S. Ahn, L. R. Beutler, C. L. Tan, S. Kosar, L. Bai, Y. Chen, T. V.  
470 Corpuz, L. Madisen, H. Zeng and Z. A. Knight (2019). "A gut-to-brain signal of fluid osmolarity  
471 controls thirst satiation." *Nature* **568**(7750): 98-102.

472

473

474

475

476

477

478

479

480

481

482

483

484

485

486 12 Supplementary figures

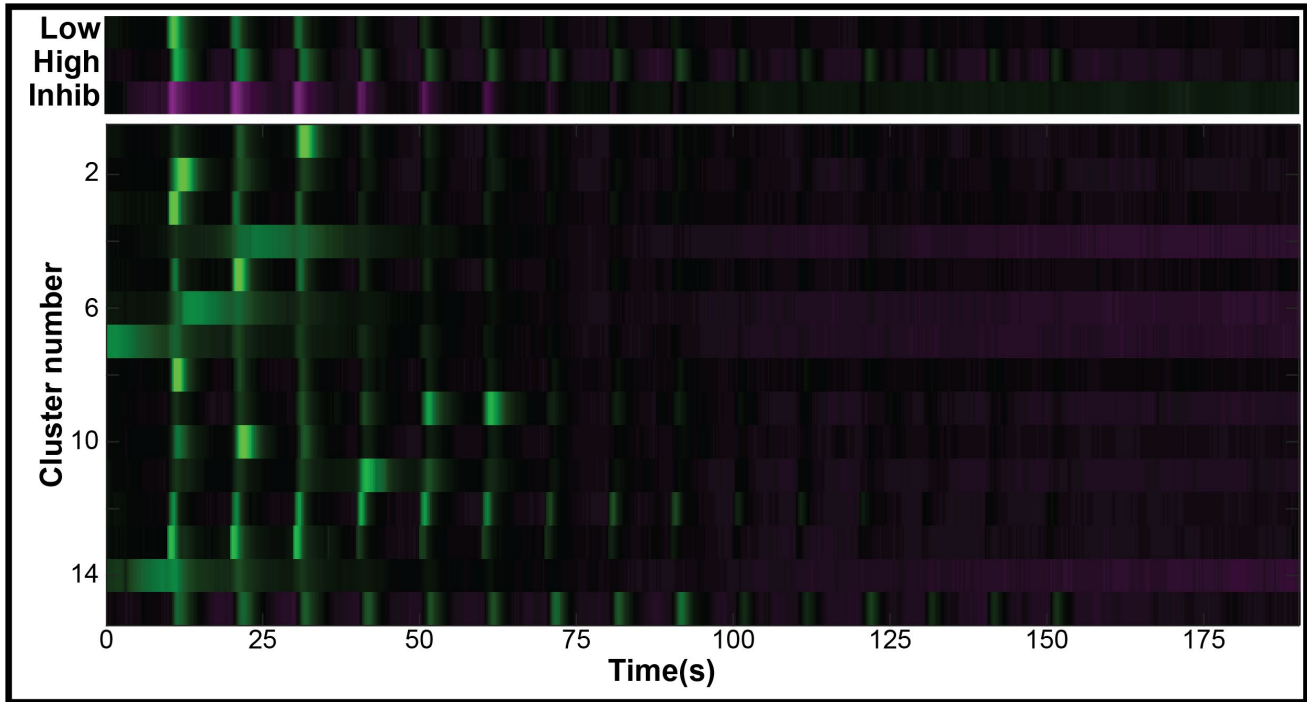

487 **Supplementary figure 1: Clustering using Non-negative Matrix Factorization**

488 The data from (Favre-Bulle, Vanwalleghem et al. 2018) were clustered with an NMF approach, using  
489 the same number of clusters as the K-means used in the original paper. Of the 15 clusters, identified  
490 the low sensitivity cluster (Cluster #3) and high sensitivity cluster (#15), but no inhibited cluster.

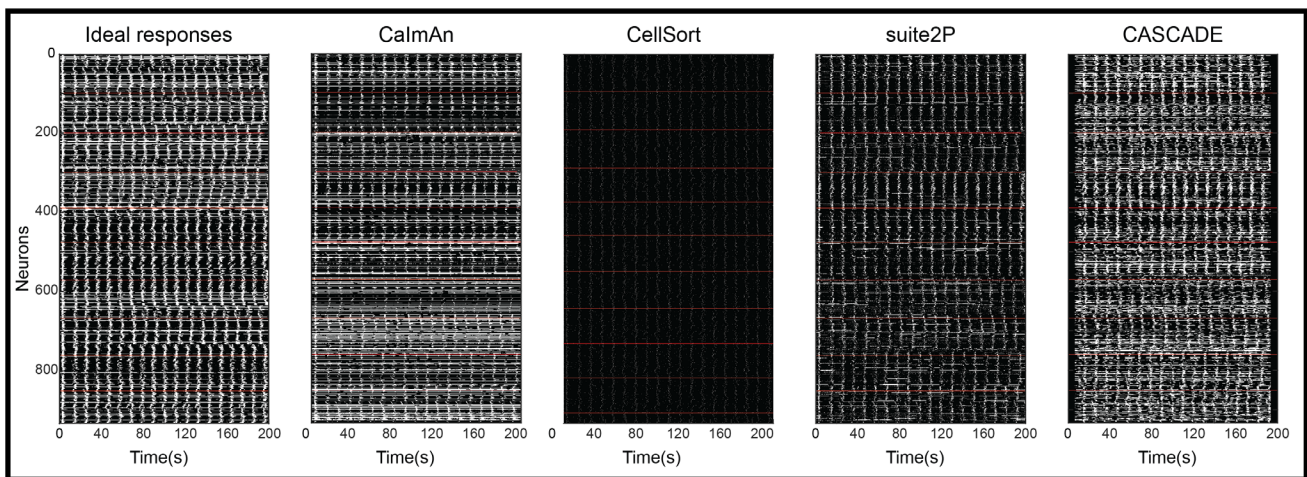

491 **Supplementary figure 2: Inferred spike trains**

492 Binarized spike trains inferred using the above algorithms from the ideal fluorescent traces.
